# Supplementary material for: Borrelia burgdorferi Migration Assays for Evaluation of Chemoattractants in Tick Saliva
Source: MDPI journal article supplement (doi:10.3390/pathogens11050530), 2022-05-01
Supplement: s1 [file s1]

**Supplemental Table S1.** Summary of Results Using the U-tube Assay.

| Matrix                           | Matrix Volume (μl) | Cells           | [Cell] (x10 <sup>7</sup> /ml) | Inocula: CA or control | [CA]  | Incubation Environment | Incubation Time (Hours) | Final Cell Count |
|----------------------------------|--------------------|-----------------|-------------------------------|------------------------|-------|------------------------|-------------------------|------------------|
| 0.1% agarose in BSK-II           | 450                | in vitro Bb     | 2.1                           | D-GlcNAc               | 100mM | 34°C trigas            | 96                      | 0                |
| 0.1% agarose in BSK-II           | 450                | in vitro Bb     | 2.1                           | PBS                    |       | 34°C trigas            | 96                      | 0                |
| 0.1% agarose in BSK-II           | 300                | in vitro Bb     | 2.3                           | D-GlcNAc               | 100mM | 34°C trigas            | 168                     | 0                |
| 0.1% agarose in BSK-II           | 300                | in vitro Bb     | 2.3                           | PBS                    |       | 34°C trigas            | 168                     | 0                |
| 0.1% agarose in BSK-II           | 300                | in vitro Bb     | 2                             | D-GlcNAc               | 500mM | 34°C trigas            | 120                     | 0                |
| 0.1% agarose in BSK-II           | 300                | in vitro Bb     | 2                             | PBS                    |       | 34°C trigas            | 120                     | 0                |
| 0.1% agarose in BSK-II           | 300                | in vitro Bb     | 1.8                           | tick saliva            | 1%    | 34°C trigas            | 72                      | 0                |
| 0.1% agarose in BSK-II           | 300                | in vitro Bb     | 1.8                           | PBS                    |       | 34°C trigas            | 72                      | 0                |
| 0.1% agarose in PBS              | 300                | in vitro Bb     | 2.8                           | chitobiose             | 10mM  | 34°C trigas            | 19                      | 0                |
| 0.1% agarose in PBS              | 300                | in vitro Bb     | 2.8                           | PBS                    |       | 34°C trigas            | 19                      | 0                |
| 0.1% agarose in PBS              | 300                | in vitro Bb     | 2.4                           | chitobiose             | 10mM  | 34°C trigas            | 24                      | 0                |
| 0.1% agarose in PBS              | 300                | in vitro Bb     | 2.4                           | PBS                    |       | 34°C trigas            | 24                      | 0                |
| 0.1% agarose in PBS              | 300                | in vitro Bb     | 2.4                           | chitobiose             | 10mM  | 34°C trigas            | 24                      | 2/cs             |
| 0.1% agarose in PBS              | 300                | in vitro Bb     | 2.4                           | PBS                    |       | 34°C trigas            | 24                      | 0                |
| 0.1% agarose in low sugar BSK-II | 300                | in vitro Bb     | 2                             | chitobiose             | 10mM  | 34°C trigas            | 45                      | 0                |
| 0.1% agarose in low sugar BSK-II | 300                | in vitro Bb     | 2                             | low sugar BSK-II       |       | 34°C trigas            | 45                      | 0                |
| 0.1% agarose in low sugar BSK-II | 300                | Host-adapted Bb | 3                             | chitobiose             | 10mM  | 34°C trigas            | 72                      | 0                |
| 0.1% agarose in low sugar BSK-II | 300                | Host-adapted Bb | 3                             | D-GlcNAc               | 100mM | 34°C trigas            | 72                      | 0                |

|                                        |     |                    |     |                                       |      |             |    |   |
|----------------------------------------|-----|--------------------|-----|---------------------------------------|------|-------------|----|---|
| 0.1% agarose<br>in low sugar<br>BSK-II | 300 | Host-adapted<br>Bb | 3   | low sugar BSK-<br>II                  |      | 34°C trigas | 72 | 0 |
| 0.1% agarose<br>in low sugar<br>BSK-II | 300 | Host-adapted<br>Bb | 3   | tick saliva                           | 5%   | 34°C trigas | 72 | 0 |
| 0.1% agarose<br>in low sugar<br>BSK-II | 300 | Host-adapted<br>Bb | 3   | chitobiose                            | 10mM | 34°C trigas | 72 | 0 |
| 0.1% agarose<br>in low sugar<br>BSK-II | 300 | Host-adapted<br>Bb | 3   | low sugar BSK-<br>II                  |      | 34°C trigas | 72 | 0 |
| 4% gelatin in<br>low sugar<br>BSK-II   | 300 | Host-adapted<br>Bb | 1.8 | chitobiose in<br>low sugar BSK-<br>II | 10mM | 23°C        | 48 | 0 |
